2022 | VOLUME 75 | NUMBER 1

# The American Journal of Psychotherapy

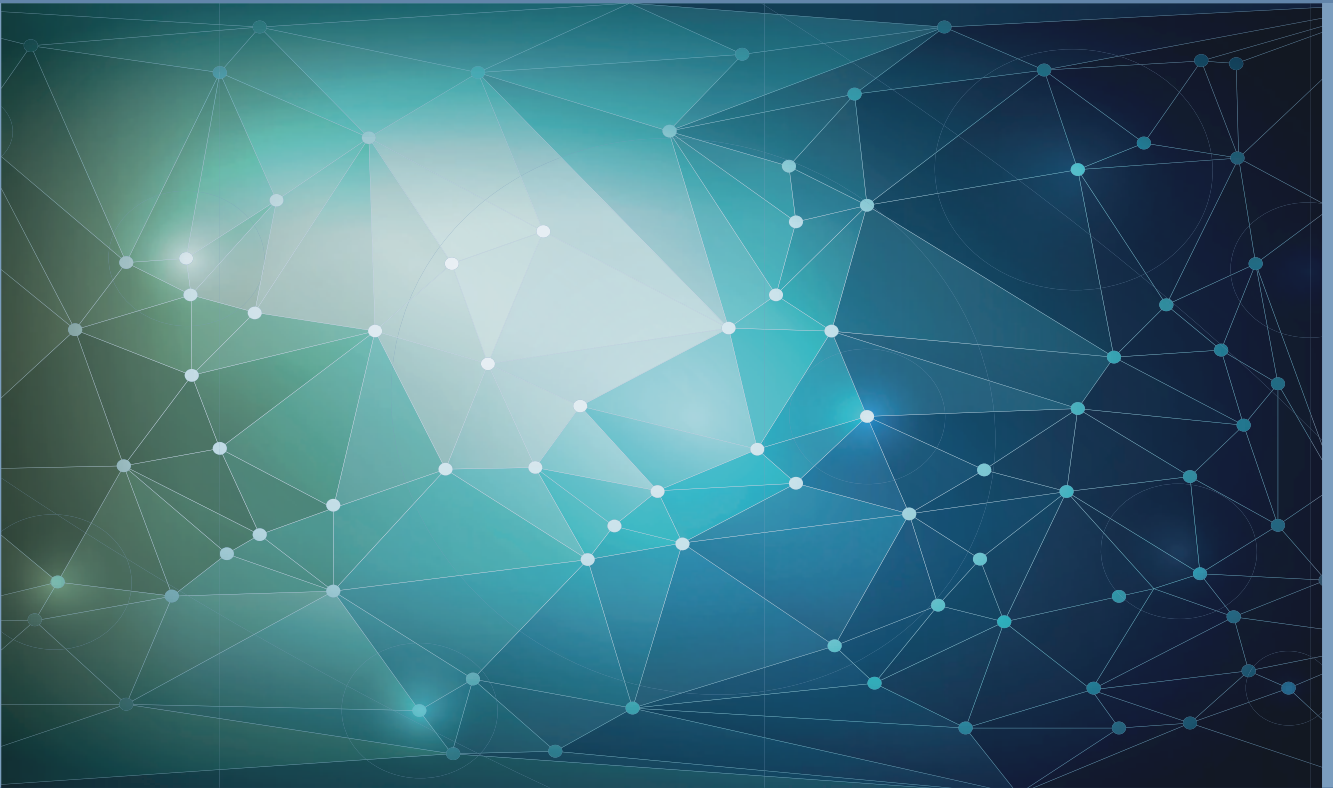

## Special Issue: The Expanding Scope of Mentalization-Based Therapy

Guest Editor: Lois W. Choi-Kain, M.D., M.Ed.

AMERICAN  
PSYCHIATRIC  
ASSOCIATION

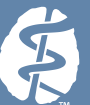

[psychotherapy.psychiatryonline.org](http://psychotherapy.psychiatryonline.org)
